# Supplementary material
Source: publisher figshare collection journal article supplement (https://springernature.figshare.com/ndownloader/files/28130862)
Supplement: Supplementary file 1 [file 28130862]

datetime	id	value
1548990000	13	0.0
1548990000	14	0.0
1548990000	17	0.039
1548990000	19	0.084
1548990000	25	0.016
1548990000	29	0.202
1548990000	30	0.0
1548990000	41	0.13
1548990000	70	0.001
1548990000	77	0.05
1548990000	89	0.0663
1548990000	93	0.391
1548990000	95	0.0
1548990900	13	0.0
1548990900	14	0.0
1548990900	17	0.004
1548990900	19	0.085
1548990900	25	0.016
1548990900	29	0.157
1548990900	30	0.0
1548990900	41	0.148
1548990900	70	0.0
1548990900	77	0.079
1548990900	89	0.0637
1548990900	93	0.504
1548990900	95	0.0
1548991800	13	0.0
1548991800	14	0.0
1548991800	17	0.005
1548991800	19	0.09
1548991800	25	0.017
1548991800	29	0.127
1548991800	30	0.0
1548991800	41	0.127
1548991800	70	0.001
1548991800	77	0.074
1548991800	89	0.0618
1548991800	93	0.4
1548991800	95	0.0
1548992700	13	0.0
1548992700	14	0.0
1548992700	17	0.038
1548992700	19	0.083
1548992700	25	0.016
1548992700	29	0.113
1548992700	30	0.0
1548992700	41	0.139
1548992700	70	0.001
1548992700	77	0.048
1548992700	89	0.0598
1548992700	93	0.266
1548992700	95	0.0
1548993600	13	0.0
1548993600	14	0.0
1548993600	17	0.024
1548993600	19	0.044
1548993600	25	0.016
1548993600	29	0.115
1548993600	30	0.0
1548993600	41	0.162
1548993600	70	0.0
1548993600	77	0.052
1548993600	89	0.0576
1548993600	93	0.072
1548993600	95	0.0
1548994500	13	0.0
1548994500	14	0.0
1548994500	17	0.005
1548994500	19	0.079
1548994500	25	0.017
1548994500	29	0.11
1548994500	30	0.0
1548994500	41	0.117
1548994500	70	0.001
1548994500	77	0.086
1548994500	89	0.0561
1548994500	93	0.202
1548994500	95	0.0
1548995400	13	0.0
1548995400	14	0.0
1548995400	17	0.012
1548995400	19	0.095
1548995400	25	0.016
1548995400	29	0.088
1548995400	30	0.0
1548995400	41	0.136
1548995400	70	0.001
1548995400	77	0.223
1548995400	89	0.0545
1548995400	93	0.139
1548995400	95	0.0
1548996300	13	0.0
1548996300	14	0.0
1548996300	17	0.041
1548996300	19	0.092
1548996300	25	0.017
1548996300	29	0.152
1548996300	30	0.0
1548996300	41	0.15
1548996300	70	0.0
1548996300	77	0.049
1548996300	89	0.0527
1548996300	93	0.201
1548996300	95	0.0
1548997200	13	0.0
1548997200	14	0.0
1548997200	17	0.009
1548997200	19	0.09
1548997200	25	0.016
1548997200	29	0.092
1548997200	30	0.0
1548997200	41	0.133
1548997200	70	0.001
1548997200	77	0.061
1548997200	89	0.0516
1548997200	93	0.25
1548997200	95	0.0
1548998100	13	0.0
1548998100	14	0.0
1548998100	17	0.005
1548998100	19	0.089
1548998100	25	0.016
1548998100	29	0.089
1548998100	30	0.0
1548998100	41	0.134
1548998100	70	0.001
1548998100	77	0.086
1548998100	89	0.0507
1548998100	93	0.162
1548998100	95	0.0
1548999000	13	0.0
1548999000	14	0.0
1548999000	17	0.031
1548999000	19	0.102
1548999000	25	0.012
1548999000	29	0.113
1548999000	30	0.0
1548999000	41	0.148
1548999000	70	0.001
1548999000	77	0.058
1548999000	89	0.0498
1548999000	93	0.105
1548999000	95	0.0
1548999900	13	0.0
1548999900	14	0.0
1548999900	17	0.026
1548999900	19	0.089
1548999900	25	0.012
1548999900	29	0.08
1548999900	30	0.0
1548999900	41	0.124
1548999900	70	0.0
1548999900	77	0.048
1548999900	89	0.0491
1548999900	93	0.052
1548999900	95	0.0
1549000800	13	0.0
1549000800	14	0.0
1549000800	17	0.009
1549000800	19	0.075
1549000800	25	0.012
1549000800	29	0.07
1549000800	30	0.0
1549000800	41	0.134
1549000800	70	0.001
1549000800	77	0.053
1549000800	89	0.0484
1549000800	93	0.097
1549000800	95	0.0
1549001700	13	0.0
1549001700	14	0.0
1549001700	17	0.011
1549001700	19	0.075
1549001700	25	0.015
1549001700	29	0.081
1549001700	30	0.0
1549001700	41	0.15
1549001700	70	0.001
1549001700	77	0.082
1549001700	89	0.0477
1549001700	93	0.071
1549001700	95	0.0
1549002600	13	0.0
1549002600	14	0.0
1549002600	17	0.042
1549002600	19	0.073
1549002600	25	0.017
1549002600	29	0.117
1549002600	30	0.0
1549002600	41	0.122
1549002600	70	0.0
1549002600	77	0.052
1549002600	89	0.0475
1549002600	93	0.106
1549002600	95	0.0
1549003500	13	0.0
1549003500	14	0.0
1549003500	17	0.006
1549003500	19	0.074
1549003500	25	0.016
1549003500	29	0.065
1549003500	30	0.0
1549003500	41	0.252
1549003500	70	0.001
1549003500	77	0.044
1549003500	89	0.0469
1549003500	93	0.049
1549003500	95	0.0
1549004400	13	0.0
1549004400	14	0.0
1549004400	17	0.005
1549004400	19	0.074
1549004400	25	0.017
1549004400	29	0.07
1549004400	30	0.0
1549004400	41	0.149
1549004400	70	0.001
1549004400	77	0.051
1549004400	89	0.0464
1549004400	93	0.082
1549004400	95	0.0
1549005300	13	0.0
1549005300	14	0.0
1549005300	17	0.028
1549005300	19	0.073
1549005300	25	0.017
1549005300	29	0.081
1549005300	30	0.0
1549005300	41	0.124
1549005300	70	0.0
1549005300	77	0.082
1549005300	89	0.0461
1549005300	93	0.075
1549005300	95	0.0
1549006200	13	0.0
1549006200	14	0.0
1549006200	17	0.028
1549006200	19	0.099
1549006200	25	0.017
1549006200	29	0.062
1549006200	30	0.0
1549006200	41	0.135
1549006200	70	0.001
1549006200	77	0.055
1549006200	89	0.0455
1549006200	93	0.109
1549006200	95	0.0
1549007100	13	0.0
1549007100	14	0.0
1549007100	17	0.004
1549007100	19	0.09
1549007100	25	0.015
1549007100	29	0.061
1549007100	30	0.0
1549007100	41	0.147
1549007100	70	0.001
1549007100	77	0.043
1549007100	89	0.0456
1549007100	93	0.047
1549007100	95	0.0
1549008000	13	0.0
1549008000	14	0.0
1549008000	17	0.005
1549008000	19	0.066
1549008000	25	0.011
1549008000	29	0.073
1549008000	30	0.0
1549008000	41	0.124
1549008000	70	0.0
1549008000	77	0.049
1549008000	89	0.0457
1549008000	93	0.07
1549008000	95	0.0
1549008900	13	0.0
1549008900	14	0.0
1549008900	17	0.043
1549008900	19	0.065
1549008900	25	0.01
1549008900	29	0.064
1549008900	30	0.0
1549008900	41	0.136
1549008900	70	0.001
1549008900	77	0.081
1549008900	89	0.0457
1549008900	93	0.059
1549008900	95	0.0
1549009800	13	0.0
1549009800	14	0.0
1549009800	17	0.012
1549009800	19	0.064
1549009800	25	0.014
1549009800	29	0.046
1549009800	30	0.0
1549009800	41	0.148
1549009800	70	0.001
1549009800	77	0.054
1549009800	89	0.0454
1549009800	93	0.108
1549009800	95	0.0
1549010700	13	0.0
1549010700	14	0.0
1549010700	17	0.005
1549010700	19	0.063
1549010700	25	0.017
1549010700	29	0.063
1549010700	30	0.0
1549010700	41	0.123
1549010700	70	0.0
1549010700	77	0.043
1549010700	89	0.0455
1549010700	93	0.076
1549010700	95	0.0
1549011600	13	0.0
1549011600	14	0.0
1549011600	17	0.021
1549011600	19	0.063
1549011600	25	0.017
1549011600	29	0.048
1549011600	30	0.0
1549011600	41	0.134
1549011600	70	0.001
1549011600	77	0.044
1549011600	89	0.0448
1549011600	93	0.053
1549011600	95	0.0
1549012500	13	0.0
1549012500	14	0.0
1549012500	17	0.033
1549012500	19	0.062
1549012500	25	0.017
1549012500	29	0.062
1549012500	30	0.0
1549012500	41	0.15
1549012500	70	0.001
1549012500	77	0.251
1549012500	89	0.0434
1549012500	93	0.072
1549012500	95	0.0
1549013400	13	0.0
1549013400	14	0.0
1549013400	17	0.005
1549013400	19	0.062
1549013400	25	0.017
1549013400	29	0.048
1549013400	30	0.0
1549013400	41	0.122
1549013400	70	0.0
1549013400	77	0.062
1549013400	89	0.043
1549013400	93	0.348
1549013400	95	0.0
1549014300	13	0.0
1549014300	14	0.0
1549014300	17	0.004
1549014300	19	0.063
1549014300	25	0.012
1549014300	29	0.024
1549014300	30	0.0
1549014300	41	0.137
1549014300	70	0.001
1549014300	77	0.025
1549014300	89	0.0435
1549014300	93	0.264
1549014300	95	0.0
1549015200	13	0.0
1549015200	14	0.0
1549015200	17	0.034
1549015200	19	0.067
1549015200	25	0.01
1549015200	29	0.031
1549015200	30	0.0
1549015200	41	0.135
1549015200	70	0.001
1549015200	77	0.006
1549015200	89	0.0442
1549015200	93	0.014
1549015200	95	0.0
1549016100	13	0.0
1549016100	14	0.0
1549016100	17	0.021
1549016100	19	0.051
1549016100	25	0.012
1549016100	29	0.021
1549016100	30	0.0
1549016100	41	0.135
1549016100	70	0.0
1549016100	77	0.04
1549016100	89	0.0459
1549016100	93	0.01
1549016100	95	0.0
1549017000	13	0.0
1549017000	14	0.0
1549017000	17	0.004
1549017000	19	0.019
1549017000	25	0.017
1549017000	29	0.027
1549017000	30	0.0
1549017000	41	0.134
1549017000	70	0.001
1549017000	77	0.026
1549017000	89	0.0466
1549017000	93	0.017
1549017000	95	0.0
1549017900	13	0.0
1549017900	14	0.0
1549017900	17	0.008
1549017900	19	0.058
1549017900	25	0.016
1549017900	29	0.035
1549017900	30	0.0
1549017900	41	0.122
1549017900	70	0.001
1549017900	77	0.006
1549017900	89	0.0476
1549017900	93	0.041
1549017900	95	0.0
1549018800	13	0.0
1549018800	14	0.0
1549018800	17	0.042
1549018800	19	0.062
1549018800	25	0.017
1549018800	29	0.023
1549018800	30	0.0
1549018800	41	0.147
1549018800	70	0.0
1549018800	77	0.006
1549018800	89	0.0492
1549018800	93	0.025
1549018800	95	0.0
1549019700	13	0.0
1549019700	14	0.0
1549019700	17	0.009
1549019700	19	0.059
1549019700	25	0.017
1549019700	29	0.007
1549019700	30	0.0
1549019700	41	0.177
1549019700	70	0.001
1549019700	77	0.038
1549019700	89	0.0509
1549019700	93	0.011
1549019700	95	0.0
1549020600	13	0.0
1549020600	14	0.0
1549020600	17	0.005
1549020600	19	0.056
1549020600	25	0.017
1549020600	29	0.046
1549020600	30	0.0
1549020600	41	0.195
1549020600	70	0.001
1549020600	77	0.03
1549020600	89	0.0524
1549020600	93	0.011
1549020600	95	0.0
1549021500	13	0.0
1549021500	14	0.0
1549021500	17	0.019
1549021500	19	0.056
1549021500	25	0.011
1549021500	29	0.286
1549021500	30	0.0
1549021500	41	0.279
1549021500	70	0.0
1549021500	77	0.006
1549021500	89	0.0541
1549021500	93	0.034
1549021500	95	0.0
1549022400	13	0.0
1549022400	14	0.0
1549022400	17	0.279
1549022400	19	0.054
1549022400	25	0.012
1549022400	29	0.142
1549022400	30	0.0
1549022400	41	0.382
1549022400	70	0.001
1549022400	77	0.006
1549022400	89	0.0559
1549022400	93	0.04
1549022400	95	0.0
1549023300	13	0.0
1549023300	14	0.0
1549023300	17	0.411
1549023300	19	0.056
1549023300	25	0.011
1549023300	29	0.034
1549023300	30	0.0
1549023300	41	0.672
1549023300	70	0.001
1549023300	77	0.033
1549023300	89	0.059
1549023300	93	0.011
1549023300	95	0.0
1549024200	13	0.0
1549024200	14	0.0
1549024200	17	0.206
1549024200	19	0.057
1549024200	25	0.016
1549024200	29	0.096
1549024200	30	0.0
1549024200	41	0.61
1549024200	70	0.0
1549024200	77	0.035
1549024200	89	0.0614
1549024200	93	0.01
1549024200	95	0.0
1549025100	13	0.0
1549025100	14	0.0
1549025100	17	0.068
1549025100	19	0.054
1549025100	25	0.017
1549025100	29	0.269
1549025100	30	0.0
1549025100	41	0.639
1549025100	70	0.001
1549025100	77	0.005
1549025100	89	0.0626
1549025100	93	0.017
1549025100	95	0.0
1549026000	13	0.0
1549026000	14	0.0
1549026000	17	0.03
1549026000	19	0.053
1549026000	25	0.016
1549026000	29	0.264
1549026000	30	0.0
1549026000	41	0.651
1549026000	70	0.001
1549026000	77	0.006
1549026000	89	0.0656
1549026000	93	0.041
1549026000	95	0.0
1549026900	13	0.0
1549026900	14	0.0
1549026900	17	0.021
1549026900	19	0.053
1549026900	25	0.016
1549026900	29	0.233
1549026900	30	0.0
1549026900	41	0.641
1549026900	70	0.0
1549026900	77	0.032
1549026900	89	0.0703
1549026900	93	0.024
1549026900	95	0.0
1549027800	13	0.0
1549027800	14	0.0
1549027800	17	0.038
1549027800	19	0.052
1549027800	25	0.016
1549027800	29	0.244
1549027800	30	0.0
1549027800	41	0.955
1549027800	70	0.001
1549027800	77	0.039
1549027800	89	0.0721
1549027800	93	0.01
1549027800	95	0.0
1549028700	13	0.0
1549028700	14	0.0
1549028700	17	0.005
1549028700	19	0.052
1549028700	25	0.016
1549028700	29	0.182
1549028700	30	0.0
1549028700	41	1.074
1549028700	70	0.001
1549028700	77	0.006
1549028700	89	0.0731
1549028700	93	0.01
1549028700	95	0.0
1549029600	13	0.0
1549029600	14	0.0
1549029600	17	0.006
1549029600	19	0.052
1549029600	25	0.016
1549029600	29	0.036
1549029600	30	0.0
1549029600	41	1.128
1549029600	70	0.0
1549029600	77	0.006
1549029600	89	0.0748
1549029600	93	0.047
1549029600	95	0.0
1549030500	13	0.0
1549030500	14	0.0
1549030500	17	0.042
1549030500	19	0.036
1549030500	25	0.016
1549030500	29	0.071
1549030500	30	0.0
1549030500	41	1.289
1549030500	70	0.001
1549030500	77	0.103
1549030500	89	0.0761
1549030500	93	0.056
1549030500	95	0.0
1549031400	13	0.0
1549031400	14	0.0
1549031400	17	0.019
1549031400	19	0.012
1549031400	25	0.016
1549031400	29	0.134
1549031400	30	0.0
1549031400	41	1.028
1549031400	70	0.001
1549031400	77	0.145
1549031400	89	0.0785
1549031400	93	0.019
1549031400	95	0.0
1549032300	13	0.0
1549032300	14	0.0
1549032300	17	0.038
1549032300	19	0.033
1549032300	25	0.016
1549032300	29	0.098
1549032300	30	0.0
1549032300	41	0.922
1549032300	70	0.0
1549032300	77	0.003
1549032300	89	0.0806
1549032300	93	0.038
1549032300	95	0.0
1549033200	13	0.0
1549033200	14	0.0
1549033200	17	0.046
1549033200	19	0.054
1549033200	25	0.016
1549033200	29	0.055
1549033200	30	0.0
1549033200	41	0.937
1549033200	70	0.001
1549033200	77	0.003
1549033200	89	0.0825
1549033200	93	0.226
1549033200	95	0.0
1549034100	13	0.0
1549034100	14	0.0
1549034100	17	0.048
1549034100	19	0.057
1549034100	25	0.017
1549034100	29	0.06
1549034100	30	0.0
1549034100	41	0.996
1549034100	70	0.001
1549034100	77	0.024
1549034100	89	0.0839
1549034100	93	0.292
1549034100	95	0.0
1549035000	13	0.0
1549035000	14	0.0
1549035000	17	0.176
1549035000	19	0.105
1549035000	25	0.017
1549035000	29	0.047
1549035000	30	0.0
1549035000	41	0.936
1549035000	70	0.0
1549035000	77	0.04
1549035000	89	0.0852
1549035000	93	0.063
1549035000	95	0.0
1549035900	13	0.0
1549035900	14	0.0
1549035900	17	0.157
1549035900	19	0.082
1549035900	25	0.017
1549035900	29	0.119
1549035900	30	0.0
1549035900	41	0.938
1549035900	70	0.001
1549035900	77	0.006
1549035900	89	0.0862
1549035900	93	0.299
1549035900	95	0.0
1549036800	13	0.0
1549036800	14	0.0
1549036800	17	0.038
1549036800	19	0.085
1549036800	25	0.017
1549036800	29	0.277
1549036800	30	0.0
1549036800	41	0.979
1549036800	70	0.001
1549036800	77	0.003
1549036800	89	0.0874
1549036800	93	0.023
1549036800	95	0.0
1549037700	13	0.0
1549037700	14	0.0
1549037700	17	0.074
1549037700	19	0.083
1549037700	25	0.015
1549037700	29	0.221
1549037700	30	0.0
1549037700	41	0.921
1549037700	70	0.001
1549037700	77	0.019
1549037700	89	0.0881
1549037700	93	0.014
1549037700	95	0.0
1549038600	13	0.0
1549038600	14	0.0
1549038600	17	0.07
1549038600	19	0.082
1549038600	25	0.013
1549038600	29	0.219
1549038600	30	0.0
1549038600	41	0.796
1549038600	70	0.0
1549038600	77	0.04
1549038600	89	0.0888
1549038600	93	0.019
1549038600	95	0.0
1549039500	13	0.0
1549039500	14	0.0
1549039500	17	0.039
1549039500	19	0.081
1549039500	25	0.014
1549039500	29	0.228
1549039500	30	0.0
1549039500	41	1.01
1549039500	70	0.001
1549039500	77	0.007
1549039500	89	0.0901
1549039500	93	0.046
1549039500	95	0.0
1549040400	13	0.0
1549040400	14	0.0
1549040400	17	0.07
1549040400	19	0.083
1549040400	25	0.013
1549040400	29	0.226
1549040400	30	0.0
1549040400	41	0.914
1549040400	70	0.001
1549040400	77	0.003
1549040400	89	0.0907
1549040400	93	0.039
1549040400	95	0.0
1549041300	13	0.0
1549041300	14	0.0
1549041300	17	0.071
1549041300	19	0.056
1549041300	25	0.019
1549041300	29	0.176
1549041300	30	0.0
1549041300	41	0.806
1549041300	70	0.0
1549041300	77	0.021
1549041300	89	0.0914
1549041300	93	0.015
1549041300	95	0.0
1549042200	13	0.0
1549042200	14	0.0
1549042200	17	0.07
1549042200	19	0.039
1549042200	25	0.019
1549042200	29	0.014
1549042200	30	0.0
1549042200	41	0.716
1549042200	70	0.001
1549042200	77	0.04
1549042200	89	0.0919
1549042200	93	0.015
1549042200	95	0.0
1549043100	13	0.0
1549043100	14	0.0
1549043100	17	0.082
1549043100	19	0.092
1549043100	25	0.019
1549043100	29	0.02
1549043100	30	0.0
1549043100	41	0.724
1549043100	70	0.001
1549043100	77	0.009
1549043100	89	0.0925
1549043100	93	0.031
1549043100	95	0.0
1549044000	13	0.0
1549044000	14	0.0
1549044000	17	0.082
1549044000	19	0.087
1549044000	25	0.02
1549044000	29	0.072
1549044000	30	0.0
1549044000	41	0.698
1549044000	70	0.0
1549044000	77	0.003
1549044000	89	0.0923
1549044000	93	0.045
1549044000	95	0.0
1549044900	13	0.0
1549044900	14	0.0
1549044900	17	0.073
1549044900	19	0.085
1549044900	25	0.02
1549044900	29	0.277
1549044900	30	0.0
1549044900	41	0.711
1549044900	70	0.001
1549044900	77	0.02
1549044900	89	0.0925
1549044900	93	0.027
1549044900	95	0.0
1549045800	13	0.0
1549045800	14	0.0
1549045800	17	0.066
1549045800	19	0.083
1549045800	25	0.02
1549045800	29	0.3
1549045800	30	0.0
1549045800	41	0.695
1549045800	70	0.001
1549045800	77	0.041
1549045800	89	0.0922
1549045800	93	0.014
1549045800	95	0.0
1549046700	13	0.0
1549046700	14	0.0
1549046700	17	0.052
1549046700	19	0.077
1549046700	25	0.014
1549046700	29	0.145
1549046700	30	0.0
1549046700	41	0.692
1549046700	70	0.001
1549046700	77	0.007
1549046700	89	0.0921
1549046700	93	0.015
1549046700	95	0.0
1549047600	13	0.0
1549047600	14	0.0
1549047600	17	0.052
1549047600	19	0.061
1549047600	25	0.013
1549047600	29	0.231
1549047600	30	0.0
1549047600	41	0.698
1549047600	70	0.0
1549047600	77	0.003
1549047600	89	0.0929
1549047600	93	0.042
1549047600	95	0.0
1549048500	13	0.0
1549048500	14	0.0
1549048500	17	0.064
1549048500	19	0.057
1549048500	25	0.016
1549048500	29	0.244
1549048500	30	0.0
1549048500	41	0.808
1549048500	70	0.001
1549048500	77	0.087
1549048500	89	0.0928
1549048500	93	0.043
1549048500	95	0.0
1549049400	13	0.0
1549049400	14	0.0
1549049400	17	0.029
1549049400	19	0.056
1549049400	25	0.022
1549049400	29	0.259
1549049400	30	0.0
1549049400	41	0.922
1549049400	70	0.001
1549049400	77	0.145
1549049400	89	0.0931
1549049400	93	0.015
1549049400	95	0.0
1549050300	13	0.0
1549050300	14	0.0
1549050300	17	0.064
1549050300	19	0.056
1549050300	25	0.024
1549050300	29	0.27
1549050300	30	0.0
1549050300	41	0.972
1549050300	70	0.0
1549050300	77	0.009
1549050300	89	0.0933
1549050300	93	0.015
1549050300	95	0.0
1549051200	13	0.0
1549051200	14	0.0
1549051200	17	0.162
1549051200	19	0.055
1549051200	25	0.017
1549051200	29	0.162
1549051200	30	0.0
1549051200	41	0.909
1549051200	70	0.001
1549051200	77	0.011
1549051200	89	0.0938
1549051200	93	0.023
1549051200	95	0.0
1549052100	13	0.0
1549052100	14	0.0
1549052100	17	0.054
1549052100	19	0.054
1549052100	25	0.008
1549052100	29	0.088
1549052100	30	0.0
1549052100	41	0.891
1549052100	70	0.001
1549052100	77	0.259
1549052100	89	0.0933
1549052100	93	0.046
1549052100	95	0.0
1549053000	13	0.0
1549053000	14	0.0
1549053000	17	0.065
1549053000	19	0.054
1549053000	25	0.024
1549053000	29	0.079
1549053000	30	0.0
1549053000	41	0.818
1549053000	70	0.0
1549053000	77	0.303
1549053000	89	0.0933
1549053000	93	0.033
1549053000	95	0.0
1549053900	13	0.0
1549053900	14	0.0
1549053900	17	0.077
1549053900	19	0.054
1549053900	25	0.024
1549053900	29	0.088
1549053900	30	0.0
1549053900	41	0.876
1549053900	70	0.001
1549053900	77	0.291
1549053900	89	0.0943
1549053900	93	0.014
1549053900	95	0.0
1549054800	13	0.0
1549054800	14	0.0
1549054800	17	0.074
1549054800	19	0.054
1549054800	25	0.017
1549054800	29	0.08
1549054800	30	0.0
1549054800	41	0.898
1549054800	70	0.001
1549054800	77	0.3
1549054800	89	0.0939
1549054800	93	0.015
1549054800	95	0.0
1549055700	13	0.0
1549055700	14	0.0
1549055700	17	0.074
1549055700	19	0.055
1549055700	25	0.008
1549055700	29	0.054
1549055700	30	0.0
1549055700	41	0.843
1549055700	70	0.0
1549055700	77	0.323
1549055700	89	0.0932
1549055700	93	0.035
1549055700	95	0.0
1549056600	13	0.0
1549056600	14	0.0
1549056600	17	0.087
1549056600	19	0.053
1549056600	25	0.024
1549056600	29	0.182
1549056600	30	0.0
1549056600	41	0.823
1549056600	70	0.001
1549056600	77	0.285
1549056600	89	0.0924
1549056600	93	0.044
1549056600	95	0.0
1549057500	13	0.0
1549057500	14	0.0
1549057500	17	0.068
1549057500	19	0.025
1549057500	25	0.022
1549057500	29	0.272
1549057500	30	0.0
1549057500	41	0.888
1549057500	70	0.001
1549057500	77	0.279
1549057500	89	0.0908
1549057500	93	0.02
1549057500	95	0.0
1549058400	13	0.0
1549058400	14	0.0
1549058400	17	0.067
1549058400	19	0.013
1549058400	25	0.021
1549058400	29	0.243
1549058400	30	0.0
1549058400	41	0.827
1549058400	70	0.0
1549058400	77	0.281
1549058400	89	0.0893
1549058400	93	0.015
1549058400	95	0.0
1549059300	13	0.0
1549059300	14	0.0
1549059300	17	0.083
1549059300	19	0.049
1549059300	25	0.023
1549059300	29	0.269
1549059300	30	0.0
1549059300	41	0.823
1549059300	70	0.001
1549059300	77	0.313
1549059300	89	0.0886
1549059300	93	0.023
1549059300	95	0.0
1549060200	13	0.0
1549060200	14	0.0
1549060200	17	0.047
1549060200	19	0.056
1549060200	25	0.043
1549060200	29	0.169
1549060200	30	0.0
1549060200	41	0.565
1549060200	70	0.001
1549060200	77	0.286
1549060200	89	0.0875
1549060200	93	0.07
1549060200	95	0.0
1549061100	13	0.0
1549061100	14	0.0
1549061100	17	0.062
1549061100	19	0.055
1549061100	25	0.015
1549061100	29	0.261
1549061100	30	0.0
1549061100	41	0.443
1549061100	70	0.0
1549061100	77	0.206
1549061100	89	0.0872
1549061100	93	0.055
1549061100	95	0.0
1549062000	13	0.0
1549062000	14	0.0
1549062000	17	0.113
1549062000	19	0.055
1549062000	25	0.017
1549062000	29	0.153
1549062000	30	0.0
1549062000	41	0.472
1549062000	70	0.001
1549062000	77	0.439
1549062000	89	0.0886
1549062000	93	0.056
1549062000	95	0.0
1549062900	13	0.0
1549062900	14	0.0
1549062900	17	0.179
1549062900	19	0.116
1549062900	25	0.016
1549062900	29	0.171
1549062900	30	0.0
1549062900	41	0.455
1549062900	70	0.001
1549062900	77	0.434
1549062900	89	0.0907
1549062900	93	0.035
1549062900	95	0.0
1549063800	13	0.0
1549063800	14	0.0
1549063800	17	0.671
1549063800	19	0.48
1549063800	25	0.019
1549063800	29	0.07
1549063800	30	0.0
1549063800	41	0.44
1549063800	70	0.0
1549063800	77	0.116
1549063800	89	0.0934
1549063800	93	0.301
1549063800	95	0.0
1549064700	13	0.0
1549064700	14	0.0
1549064700	17	0.399
1549064700	19	0.471
1549064700	25	0.02
1549064700	29	0.055
1549064700	30	0.0
1549064700	41	0.463
1549064700	70	0.001
1549064700	77	0.053
1549064700	89	0.0948
1549064700	93	0.192
1549064700	95	0.0
1549065600	13	0.0
1549065600	14	0.0
1549065600	17	0.179
1549065600	19	0.408
1549065600	25	0.019
1549065600	29	0.055
1549065600	30	0.0
1549065600	41	0.169
1549065600	70	0.0
1549065600	77	0.051
1549065600	89	0.0954
1549065600	93	0.062
1549065600	95	0.0
1549066500	13	0.0
1549066500	14	0.0
1549066500	17	0.082
1549066500	19	0.16
1549066500	25	0.019
1549066500	29	0.056
1549066500	30	0.0
1549066500	41	0.107
1549066500	70	0.001
1549066500	77	0.019
1549066500	89	0.0951
1549066500	93	0.053
1549066500	95	0.0
1549067400	13	0.0
1549067400	14	0.0
1549067400	17	0.09
1549067400	19	0.306
1549067400	25	0.019
1549067400	29	0.099
1549067400	30	0.0
1549067400	41	0.125
1549067400	70	0.001
1549067400	77	0.032
1549067400	89	0.0947
1549067400	93	0.034
1549067400	95	0.0
1549068300	13	0.0
1549068300	14	0.0
1549068300	17	0.064
1549068300	19	0.443
1549068300	25	0.015
1549068300	29	0.041
1549068300	30	0.0
1549068300	41	0.108
1549068300	70	0.0
1549068300	77	0.051
1549068300	89	0.0941
1549068300	93	0.045
1549068300	95	0.0
1549069200	13	0.0
1549069200	14	0.0
1549069200	17	0.067
1549069200	19	0.292
1549069200	25	0.014
1549069200	29	0.099
1549069200	30	0.0
1549069200	41	0.109
1549069200	70	0.001
1549069200	77	0.031
1549069200	89	0.0944
1549069200	93	0.057
1549069200	95	0.0
1549070100	13	0.0
1549070100	14	0.0
1549070100	17	0.075
1549070100	19	0.118
1549070100	25	0.014
1549070100	29	0.057
1549070100	30	0.0
1549070100	41	0.114
1549070100	70	0.001
1549070100	77	0.015
1549070100	89	0.0921
1549070100	93	0.061
1549070100	95	0.0
1549071000	13	0.0
1549071000	14	0.0
1549071000	17	0.041
1549071000	19	0.116
1549071000	25	0.013
1549071000	29	0.057
1549071000	30	0.0
1549071000	41	0.112
1549071000	70	0.0
1549071000	77	0.047
1549071000	89	0.0893
1549071000	93	0.052
1549071000	95	0.0
1549071900	13	0.0
1549071900	14	0.0
1549071900	17	0.068
1549071900	19	0.106
1549071900	25	0.017
1549071900	29	0.092
1549071900	30	0.0
1549071900	41	0.097
1549071900	70	0.001
1549071900	77	0.044
1549071900	89	0.0859
1549071900	93	0.031
1549071900	95	0.0
1549072800	13	0.0
1549072800	14	0.0
1549072800	17	0.07
1549072800	19	0.103
1549072800	25	0.018
1549072800	29	0.057
1549072800	30	0.0
1549072800	41	0.116
1549072800	70	0.001
1549072800	77	0.015
1549072800	89	0.0834
1549072800	93	0.032
1549072800	95	0.0
1549073700	13	0.0
1549073700	14	0.0
1549073700	17	0.007
1549073700	19	0.092
1549073700	25	0.018
1549073700	29	0.055
1549073700	30	0.0
1549073700	41	0.118
1549073700	70	0.0
1549073700	77	0.03
1549073700	89	0.0819
1549073700	93	0.047
1549073700	95	0.0
1549074600	13	0.0
1549074600	14	0.0
1549074600	17	0.03
1549074600	19	0.089
1549074600	25	0.018
1549074600	29	0.23
1549074600	30	0.0
1549074600	41	0.191
1549074600	70	0.001
1549074600	77	0.055
1549074600	89	0.0799
1549074600	93	0.062
1549074600	95	0.0
1549075500	13	0.0
1549075500	14	0.0
1549075500	17	0.031
1549075500	19	0.088
1549075500	25	0.018
1549075500	29	0.366
1549075500	30	0.0
1549075500	41	0.132
1549075500	70	0.001
1549075500	77	0.068
1549075500	89	0.0775
1549075500	93	0.047
1549075500	95	0.0
1549076400	13	0.0
1549076400	14	0.0
1549076400	17	0.004
1549076400	19	0.086
1549076400	25	0.018
1549076400	29	0.298
1549076400	30	0.0
1549076400	41	0.1
1549076400	70	0.0
1549076400	77	0.254
1549076400	89	0.0753
1549076400	93	0.089
1549076400	95	0.0
1549077300	13	0.0
1549077300	14	0.0
1549077300	17	0.036
1549077300	19	0.086
1549077300	25	0.017
1549077300	29	0.163
1549077300	30	0.0
1549077300	41	0.099
1549077300	70	0.001
1549077300	77	0.066
1549077300	89	0.0727
1549077300	93	0.054
1549077300	95	0.0
1549078200	13	0.0
1549078200	14	0.0
1549078200	17	0.022
1549078200	19	0.086
1549078200	25	0.018
1549078200	29	0.228
1549078200	30	0.0
1549078200	41	0.125
1549078200	70	0.001
1549078200	77	0.043
1549078200	89	0.0712
1549078200	93	0.069
1549078200	95	0.0
1549079100	13	0.0
1549079100	14	0.0
1549079100	17	0.005
1549079100	19	0.085
1549079100	25	0.014
1549079100	29	0.165
1549079100	30	0.0
1549079100	41	0.098
1549079100	70	0.0
1549079100	77	0.054
1549079100	89	0.0695
1549079100	93	0.065
1549079100	95	0.0
1549080000	13	0.0
1549080000	14	0.0
1549080000	17	0.041
1549080000	19	0.086
1549080000	25	0.015
1549080000	29	0.156
1549080000	30	0.0
1549080000	41	0.11
1549080000	70	0.001
1549080000	77	0.08
1549080000	89	0.067
1549080000	93	0.173
1549080000	95	0.0
1549080900	13	0.0
1549080900	14	0.0
1549080900	17	0.016
1549080900	19	0.085
1549080900	25	0.016
1549080900	29	0.144
1549080900	30	0.0
1549080900	41	0.115
1549080900	70	0.001
1549080900	77	0.065
1549080900	89	0.0646
1549080900	93	0.339
1549080900	95	0.0
1549081800	13	0.0
1549081800	14	0.0
1549081800	17	0.009
1549081800	19	0.086
1549081800	25	0.016
1549081800	29	0.18
1549081800	30	0.0
1549081800	41	0.109
1549081800	70	0.0
1549081800	77	0.043
1549081800	89	0.0628
1549081800	93	0.352
1549081800	95	0.0
1549082700	13	0.0
1549082700	14	0.0
1549082700	17	0.041
1549082700	19	0.084
1549082700	25	0.016
1549082700	29	0.14
1549082700	30	0.0
1549082700	41	0.101
1549082700	70	0.001
1549082700	77	0.058
1549082700	89	0.0611
1549082700	93	0.084
1549082700	95	0.0
1549083600	13	0.0
1549083600	14	0.0
1549083600	17	0.006
1549083600	19	0.084
1549083600	25	0.015
1549083600	29	0.124
1549083600	30	0.0
1549083600	41	0.114
1549083600	70	0.001
1549083600	77	0.082
1549083600	89	0.0596
1549083600	93	0.055
1549083600	95	0.0
1549084500	13	0.0
1549084500	14	0.0
1549084500	17	0.018
1549084500	19	0.084
1549084500	25	0.017
1549084500	29	0.121
1549084500	30	0.0
1549084500	41	0.113
1549084500	70	0.0
1549084500	77	0.083
1549084500	89	0.0584
1549084500	93	0.049
1549084500	95	0.0
1549085400	13	0.0
1549085400	14	0.0
1549085400	17	0.035
1549085400	19	0.084
1549085400	25	0.016
1549085400	29	0.135
1549085400	30	0.0
1549085400	41	0.097
1549085400	70	0.001
1549085400	77	0.053
1549085400	89	0.0572
1549085400	93	0.28
1549085400	95	0.0
1549086300	13	0.0
1549086300	14	0.0
1549086300	17	0.004
1549086300	19	0.084
1549086300	25	0.016
1549086300	29	0.119
1549086300	30	0.0
1549086300	41	0.122
1549086300	70	0.001
1549086300	77	0.088
1549086300	89	0.0562
1549086300	93	0.314
1549086300	95	0.0
1549087200	13	0.0
1549087200	14	0.0
1549087200	17	0.022
1549087200	19	0.084
1549087200	25	0.016
1549087200	29	0.136
1549087200	30	0.0
1549087200	41	0.104
1549087200	70	0.0
1549087200	77	0.083
1549087200	89	0.0553
1549087200	93	0.296
1549087200	95	0.0
1549088100	13	0.0
1549088100	14	0.0
1549088100	17	0.028
1549088100	19	0.084
1549088100	25	0.017
1549088100	29	0.137
1549088100	30	0.0
1549088100	41	0.099
1549088100	70	0.001
1549088100	77	0.085
1549088100	89	0.0544
1549088100	93	0.274
1549088100	95	0.0
1549089000	13	0.0
1549089000	14	0.0
1549089000	17	0.004
1549089000	19	0.074
1549089000	25	0.016
1549089000	29	0.034
1549089000	30	0.0
1549089000	41	0.136
1549089000	70	0.001
1549089000	77	0.052
1549089000	89	0.0535
1549089000	93	0.273
1549089000	95	0.0
1549089900	13	0.0
1549089900	14	0.0
1549089900	17	0.027
1549089900	19	0.042
1549089900	25	0.016
1549089900	29	0.0
1549089900	30	0.0
1549089900	41	0.099
1549089900	70	0.001
1549089900	77	0.044
1549089900	89	0.0525
1549089900	93	0.287
1549089900	95	0.0
1549090800	13	0.0
1549090800	14	0.0
1549090800	17	0.023
1549090800	19	0.058
1549090800	25	0.015
1549090800	29	0.0
1549090800	30	0.0
1549090800	41	0.156
1549090800	70	0.0
1549090800	77	0.075
1549090800	89	0.0518
1549090800	93	0.251
1549090800	95	0.0
1549091700	13	0.0
1549091700	14	0.0
1549091700	17	0.004
1549091700	19	0.092
1549091700	25	0.016
1549091700	29	0.0
1549091700	30	0.0
1549091700	41	0.205
1549091700	70	0.001
1549091700	77	0.077
1549091700	89	0.0505
1549091700	93	0.275
1549091700	95	0.0
1549092600	13	0.0
1549092600	14	0.0
1549092600	17	0.033
1549092600	19	0.053
1549092600	25	0.016
1549092600	29	0.0
1549092600	30	0.0
1549092600	41	0.111
1549092600	70	0.001
1549092600	77	0.044
1549092600	89	0.0494
1549092600	93	0.199
1549092600	95	0.0
1549093500	13	0.0
1549093500	14	0.0
1549093500	17	0.02
1549093500	19	0.057
1549093500	25	0.015
1549093500	29	0.078
1549093500	30	0.0
1549093500	41	0.122
1549093500	70	0.0
1549093500	77	0.044
1549093500	89	0.0485
1549093500	93	0.19
1549093500	95	0.0
1549094400	13	0.0
1549094400	14	0.0
1549094400	17	0.005
1549094400	19	0.096
1549094400	25	0.014
1549094400	29	0.092
1549094400	30	0.0
1549094400	41	0.135
1549094400	70	0.001
1549094400	77	0.075
1549094400	89	0.0481
1549094400	93	0.23
1549094400	95	0.0
1549095300	13	0.0
1549095300	14	0.0
1549095300	17	0.03
1549095300	19	0.101
1549095300	25	0.015
1549095300	29	0.102
1549095300	30	0.0
1549095300	41	0.109
1549095300	70	0.001
1549095300	77	0.068
1549095300	89	0.0481
1549095300	93	0.182
1549095300	95	0.0
1549096200	13	0.0
1549096200	14	0.0
1549096200	17	0.021
1549096200	19	0.087
1549096200	25	0.016
1549096200	29	0.077
1549096200	30	0.0
1549096200	41	0.12
1549096200	70	0.0
1549096200	77	0.211
1549096200	89	0.0475
1549096200	93	0.071
1549096200	95	0.0
1549097100	13	0.0
1549097100	14	0.0
1549097100	17	0.005
1549097100	19	0.066
1549097100	25	0.016
1549097100	29	0.099
1549097100	30	0.0
1549097100	41	0.116
1549097100	70	0.001
1549097100	77	0.043
1549097100	89	0.0474
1549097100	93	0.025
1549097100	95	0.0
1549098000	13	0.0
1549098000	14	0.0
1549098000	17	0.029
1549098000	19	0.065
1549098000	25	0.017
1549098000	29	0.071
1549098000	30	0.0
1549098000	41	0.104
1549098000	70	0.001
1549098000	77	0.079
1549098000	89	0.0466
1549098000	93	0.028
1549098000	95	0.0
1549098900	13	0.0
1549098900	14	0.0
1549098900	17	0.02
1549098900	19	0.064
1549098900	25	0.016
1549098900	29	0.069
1549098900	30	0.0
1549098900	41	0.11
1549098900	70	0.0
1549098900	77	0.063
1549098900	89	0.0445
1549098900	93	0.056
1549098900	95	0.0
1549099800	13	0.0
1549099800	14	0.0
1549099800	17	0.005
1549099800	19	0.064
1549099800	25	0.017
1549099800	29	0.058
1549099800	30	0.0
1549099800	41	0.118
1549099800	70	0.001
1549099800	77	0.042
1549099800	89	0.0434
1549099800	93	0.043
1549099800	95	0.0
1549100700	13	0.0
1549100700	14	0.0
1549100700	17	0.03
1549100700	19	0.063
1549100700	25	0.016
1549100700	29	0.066
1549100700	30	0.0
1549100700	41	0.106
1549100700	70	0.001
1549100700	77	0.015
1549100700	89	0.0436
1549100700	93	0.026
1549100700	95	0.0
1549101600	13	0.0
1549101600	14	0.0
1549101600	17	0.022
1549101600	19	0.063
1549101600	25	0.017
1549101600	29	0.07
1549101600	30	0.0
1549101600	41	0.092
1549101600	70	0.0
1549101600	77	0.044
1549101600	89	0.0438
1549101600	93	0.025
1549101600	95	0.0
1549102500	13	0.0
1549102500	14	0.0
1549102500	17	0.004
1549102500	19	0.063
1549102500	25	0.016
1549102500	29	0.046
1549102500	30	0.0
1549102500	41	0.131
1549102500	70	0.001
1549102500	77	0.023
1549102500	89	0.0449
1549102500	93	0.043
1549102500	95	0.0
1549103400	13	0.0
1549103400	14	0.0
1549103400	17	0.025
1549103400	19	0.06
1549103400	25	0.017
1549103400	29	0.008
1549103400	30	0.0
1549103400	41	0.101
1549103400	70	0.001
1549103400	77	0.006
1549103400	89	0.0454
1549103400	93	0.055
1549103400	95	0.0
1549104300	13	0.0
1549104300	14	0.0
1549104300	17	0.024
1549104300	19	0.057
1549104300	25	0.017
1549104300	29	0.03
1549104300	30	0.0
1549104300	41	0.089
1549104300	70	0.0
1549104300	77	0.007
1549104300	89	0.0458
1549104300	93	0.092
1549104300	95	0.0
1549105200	13	0.0
1549105200	14	0.0
1549105200	17	0.005
1549105200	19	0.055
1549105200	25	0.013
1549105200	29	0.032
1549105200	30	0.0
1549105200	41	0.172
1549105200	70	0.001
1549105200	77	0.045
1549105200	89	0.0468
1549105200	93	0.283
1549105200	95	0.0
1549106100	13	0.0
1549106100	14	0.0
1549106100	17	0.025
1549106100	19	0.055
1549106100	25	0.014
1549106100	29	0.025
1549106100	30	0.0
1549106100	41	0.152
1549106100	70	0.001
1549106100	77	0.021
1549106100	89	0.0486
1549106100	93	0.277
1549106100	95	0.0
1549107000	13	0.0
1549107000	14	0.0
1549107000	17	0.022
1549107000	19	0.043
1549107000	25	0.013
1549107000	29	0.019
1549107000	30	0.0
1549107000	41	0.142
1549107000	70	0.0
1549107000	77	0.006
1549107000	89	0.0494
1549107000	93	0.32
1549107000	95	0.0
1549107900	13	0.0
1549107900	14	0.0
1549107900	17	0.005
1549107900	19	0.013
1549107900	25	0.014
1549107900	29	0.035
1549107900	30	0.002
1549107900	41	0.18
1549107900	70	0.001
1549107900	77	0.01
1549107900	89	0.0503
1549107900	93	0.371
1549107900	95	0.0
1549108800	13	0.0
1549108800	14	0.0
1549108800	17	0.031
1549108800	19	0.028
1549108800	25	0.013
1549108800	29	0.035
1549108800	30	0.004
1549108800	41	0.154
1549108800	70	0.001
1549108800	77	0.044
1549108800	89	0.0521
1549108800	93	0.324
1549108800	95	0.0
1549109700	13	0.0
1549109700	14	0.0
1549109700	17	0.042
1549109700	19	0.056
1549109700	25	0.017
1549109700	29	0.02
1549109700	30	0.004
1549109700	41	0.251
1549109700	70	0.0
1549109700	77	0.02
1549109700	89	0.0539
1549109700	93	0.039
1549109700	95	0.0
1549110600	13	0.0
1549110600	14	0.0
1549110600	17	0.009
1549110600	19	0.054
1549110600	25	0.016
1549110600	29	0.025
1549110600	30	0.004
1549110600	41	0.192
1549110600	70	0.001
1549110600	77	0.006
1549110600	89	0.0549
1549110600	93	0.059
1549110600	95	0.0
1549111500	13	0.0
1549111500	14	0.0
1549111500	17	0.034
1549111500	19	0.048
1549111500	25	0.016
1549111500	29	0.033
1549111500	30	0.002
1549111500	41	0.207
1549111500	70	0.001
1549111500	77	0.043
1549111500	89	0.0559
1549111500	93	0.068
1549111500	95	0.0
1549112400	13	0.0
1549112400	14	0.0
1549112400	17	0.042
1549112400	19	0.013
1549112400	25	0.016
1549112400	29	0.026
1549112400	30	0.001
1549112400	41	0.26
1549112400	70	0.001
1549112400	77	0.137
1549112400	89	0.0578
1549112400	93	0.042
1549112400	95	0.0
1549113300	13	0.0
1549113300	14	0.0
1549113300	17	0.032
1549113300	19	0.028
1549113300	25	0.016
1549113300	29	0.02
1549113300	30	0.0
1549113300	41	0.554
1549113300	70	0.0
1549113300	77	0.154
1549113300	89	0.063
1549113300	93	0.041
1549113300	95	0.0
1549114200	13	0.0
1549114200	14	0.0
1549114200	17	0.005
1549114200	19	0.056
1549114200	25	0.016
1549114200	29	0.032
1549114200	30	0.0
1549114200	41	0.521
1549114200	70	0.001
1549114200	77	0.003
1549114200	89	0.064
1549114200	93	0.047
1549114200	95	0.0
1549115100	13	0.0
1549115100	14	0.0
1549115100	17	0.027
1549115100	19	0.054
1549115100	25	0.016
1549115100	29	0.035
1549115100	30	0.0
1549115100	41	0.577
1549115100	70	0.001
1549115100	77	0.013
1549115100	89	0.064
1549115100	93	0.071
1549115100	95	0.0
1549116000	13	0.0
1549116000	14	0.0
1549116000	17	0.035
1549116000	19	0.044
1549116000	25	0.016
1549116000	29	0.025
1549116000	30	0.0
1549116000	41	0.595
1549116000	70	0.0
1549116000	77	0.041
1549116000	89	0.0641
1549116000	93	0.057
1549116000	95	0.0
1549116900	13	0.0
1549116900	14	0.0
1549116900	17	0.006
1549116900	19	0.012
1549116900	25	0.016
1549116900	29	0.023
1549116900	30	0.0
1549116900	41	0.536
1549116900	70	0.001
1549116900	77	0.008
1549116900	89	0.0642
1549116900	93	0.039
1549116900	95	0.0
1549117800	13	0.0
1549117800	14	0.0
1549117800	17	0.042
1549117800	19	0.034
1549117800	25	0.016
1549117800	29	0.036
1549117800	30	0.0
1549117800	41	0.724
1549117800	70	0.001
1549117800	77	0.003
1549117800	89	0.0653
1549117800	93	0.039
1549117800	95	0.0
1549118700	13	0.0
1549118700	14	0.0
1549118700	17	0.04
1549118700	19	0.058
1549118700	25	0.017
1549118700	29	0.036
1549118700	30	0.0
1549118700	41	0.81
1549118700	70	0.0
1549118700	77	0.021
1549118700	89	0.0656
1549118700	93	0.053
1549118700	95	0.0
1549119600	13	0.0
1549119600	14	0.0
1549119600	17	0.04
1549119600	19	0.06
1549119600	25	0.016
1549119600	29	0.036
1549119600	30	0.0
1549119600	41	0.657
1549119600	70	0.001
1549119600	77	0.038
1549119600	89	0.0663
1549119600	93	0.068
1549119600	95	0.0
1549120500	13	0.0
1549120500	14	0.0
1549120500	17	0.04
1549120500	19	0.027
1549120500	25	0.016
1549120500	29	0.038
1549120500	30	0.0
1549120500	41	0.2
1549120500	70	0.001
1549120500	77	0.003
1549120500	89	0.0668
1549120500	93	0.187
1549120500	95	0.0
1549121400	13	0.0
1549121400	14	0.0
1549121400	17	0.042
1549121400	19	0.063
1549121400	25	0.016
1549121400	29	0.046
1549121400	30	0.0
1549121400	41	0.227
1549121400	70	0.001
1549121400	77	0.003
1549121400	89	0.0672
1549121400	93	0.115
1549121400	95	0.0
1549122300	13	0.0
1549122300	14	0.0
1549122300	17	0.075
1549122300	19	0.087
1549122300	25	0.016
1549122300	29	0.046
1549122300	30	0.0
1549122300	41	0.404
1549122300	70	0.0
1549122300	77	0.029
1549122300	89	0.0673
1549122300	93	0.056
1549122300	95	0.0
1549123200	13	0.0
1549123200	14	0.0
1549123200	17	0.16
1549123200	19	0.087
1549123200	25	0.017
1549123200	29	0.046
1549123200	30	0.0
1549123200	41	0.433
1549123200	70	0.001
1549123200	77	0.03
1549123200	89	0.0681
1549123200	93	0.092
1549123200	95	0.0
1549124100	13	0.0
1549124100	14	0.0
1549124100	17	0.076
1549124100	19	0.087
1549124100	25	0.016
1549124100	29	0.087
1549124100	30	0.0
1549124100	41	0.418
1549124100	70	0.001
1549124100	77	0.005
1549124100	89	0.0671
1549124100	93	0.092
1549124100	95	0.0
1549125000	13	0.0
1549125000	14	0.0
1549125000	17	0.066
1549125000	19	0.085
1549125000	25	0.016
1549125000	29	0.235
1549125000	30	0.0
1549125000	41	0.488
1549125000	70	0.0
1549125000	77	0.015
1549125000	89	0.0662
1549125000	93	0.065
1549125000	95	0.0
1549125900	13	0.0
1549125900	14	0.0
1549125900	17	0.034
1549125900	19	0.083
1549125900	25	0.017
1549125900	29	0.227
1549125900	30	0.0
1549125900	41	0.437
1549125900	70	0.001
1549125900	77	0.045
1549125900	89	0.066
1549125900	93	0.088
1549125900	95	0.0
1549126800	13	0.0
1549126800	14	0.0
1549126800	17	0.071
1549126800	19	0.081
1549126800	25	0.016
1549126800	29	0.212
1549126800	30	0.0
1549126800	41	0.386
1549126800	70	0.001
1549126800	77	0.013
1549126800	89	0.0652
1549126800	93	0.11
1549126800	95	0.0
1549127700	13	0.0
1549127700	14	0.0
1549127700	17	0.067
1549127700	19	0.112
1549127700	25	0.017
1549127700	29	0.164
1549127700	30	0.0
1549127700	41	0.395
1549127700	70	0.0
1549127700	77	0.008
[truncated: 8,000 more rows]
